# Supplementary material for: Repurposing Cationic Amphiphilic Antihistamines for Cancer Treatment
Source: PubMed Central journal article supplement (PMC4972561; doi:10.1016/j.ebiom.2016.06.013), 2016-06-07
Supplement: mmc1.pdf [file mmc1.pdf]

## **Repurposing cationic amphiphilic antihistamines for cancer treatment**

### **Supplemental Material:**

- Supplemental Tables S1-S7
- Supplemental Figures S1-S3

**Supplemental Table S1.** Distribution of cancers diagnosed at non-localized stage in Denmark in 1995-2011 in main cancer groups or chemotherapy records (available from 2002) and use of listed CAD and non-CAD antihistamines among those alive six months after the diagnosis.

| <b>Cancer groups (1995-2012)</b>                                     | <b>Non-user<sup>1</sup></b> | <b>Non-CAD user<sup>2</sup></b> | <b>CAD user<sup>3</sup></b> |
|----------------------------------------------------------------------|-----------------------------|---------------------------------|-----------------------------|
| Digestive organs                                                     | 30,330                      | 697                             | 392                         |
| Breast                                                               | 28,102                      | 684                             | 461                         |
| Respiratory system and thoracic organs                               | 20,729                      | 504                             | 248                         |
| Male genital organs, including skin                                  | 11,440                      | 173                             | 108                         |
| Female genital organs, including skin                                | 7,218                       | 148                             | 120                         |
| Lymphatic and haematopoietic tissue                                  | 2,929                       | 75                              | 58                          |
| Buccal cavity and pharynx                                            | 4,044                       | 92                              | 51                          |
| Urinary tract                                                        | 3,783                       | 74                              | 38                          |
| Skin (melanoma)                                                      | 1,925                       | 46                              | 23                          |
| Endocrine glands                                                     | 686                         | 12                              | 8                           |
| Mesothelium and connective tissue                                    | 536                         | 6                               | 7                           |
| Eye, brain and other parts of CNS                                    | 367                         | 9                               | 9                           |
| Bones, joints and articular cartilage                                | 58                          | 0                               | 0                           |
| Ill-defined and unspecified cancer                                   | 2,613                       | 69                              | 34                          |
| All non-localized cancers (1995-2011)                                | 114,760                     | 2,589                           | 1,557                       |
| <b>Chemotherapy records for all non-localized cancer (2002-2011)</b> |                             |                                 |                             |
| Chemotherapy recorded                                                | 33,159                      | 840                             | 395                         |
| Chemotherapy not recorded                                            | 40,741                      | 1,023                           | 503                         |
| All non-localized cancers (2002-2011)                                | 73,900                      | 1,863                           | 898                         |

<sup>1</sup> Non-user of astemizole, clemastine, desloratadine, ebastine, loratadine, terfenadine, cetirizine and fexofenadine

<sup>2</sup> Cetirizine and fexofenadine

<sup>3</sup> Astemizole, clemastine, desloratadine, ebastine, loratadine or terfenadine

**Supplemental Table S2.** Registry data used in the analyses.

| <b>The Danish Cancer Registry</b>                                                                                       |               |                                                                                                    |                                                                                   |
|-------------------------------------------------------------------------------------------------------------------------|---------------|----------------------------------------------------------------------------------------------------|-----------------------------------------------------------------------------------|
| All cancer (except nonmelanoma skin cancer); exclusion criterion before the date of index (first-time) cancer diagnosis |               | C00-C96 (except C44), B21, D32-D33, D35.2-D35.4, D42, D43, D44.3-D44.5                             |                                                                                   |
| Lung cancer                                                                                                             |               | C34                                                                                                |                                                                                   |
| <b>Danish Prescription Registry</b>                                                                                     |               |                                                                                                    |                                                                                   |
| <b>Drug</b>                                                                                                             |               | <b>Anatomical Therapeutic Chemical Classification</b>                                              |                                                                                   |
| Antihistamines                                                                                                          |               | R06AA04, R06AE07, R06AX11 <sup>1</sup> , R06AX12 <sup>1</sup> , R06AX13, R06AX22, R06AX26, R06AX27 |                                                                                   |
| Aspirin                                                                                                                 |               | B01AC06 (75 mg), N02BA01 (100, 150 mg)<br>N02BA01, N02BA51 (500 mg)                                |                                                                                   |
| Nonaspirin nonsteroidal anti-inflammatory drugs                                                                         |               | M01A except M01AX                                                                                  |                                                                                   |
| Statins                                                                                                                 |               | C10AA                                                                                              |                                                                                   |
| ACE inhibitors                                                                                                          |               | C09A, C09B                                                                                         |                                                                                   |
| Angiotensin II receptor blockers                                                                                        |               | C09C, C09D                                                                                         |                                                                                   |
| <b>National Patient Registry: Modified Charlson Comorbidity Index</b>                                                   |               |                                                                                                    |                                                                                   |
| <b>Disorder</b>                                                                                                         | <b>Weight</b> | <b>ICD-8<sup>2</sup></b>                                                                           | <b>ICD-10<sup>3</sup></b>                                                         |
| Myocardial infarction                                                                                                   | 1             | 410                                                                                                | I21;I22;I23                                                                       |
| Congestive heart failure                                                                                                | 1             | 427.09; 427.10; 427.11;<br>427.19; 428.99; 782.49                                                  | I50; I11.0; I13.0;<br>I13.2                                                       |
| Peripheral vascular disease                                                                                             | 1             | 440; 441; 442; 443;<br>444; 445                                                                    | I70; I71; I72; I73; I74;<br>I77                                                   |
| Cerebrovascular disease                                                                                                 | 1             | 430-438                                                                                            | I60-I69; G45; G46                                                                 |
| Dementia                                                                                                                | 1             | 290.09-290.19; 293.09                                                                              | F00-F03; F05.1; G30                                                               |
| Chronic pulmonary disease                                                                                               | 1             | 490-493; 515-518                                                                                   | J40-J47; J60-J67;<br>J68.4; J70.1;<br>J70.3; J84.1; J92.0;<br>J96.1; J98.2; J98.3 |
| Connective tissue disease                                                                                               | 1             | 712; 716; 734; 446;<br>135.99                                                                      | M05; M06; M08;<br>M09;M30;M31;<br>M32; M33; M34;<br>M35; M36; D86                 |
| Ulcer disease                                                                                                           | 1             | 530.91; 530.98; 531-<br>534                                                                        | K22.1; K25-K28                                                                    |
| Mild liver disease                                                                                                      | 1             | 571; 573.01; 573.04                                                                                | B18; K70.0-K70.3;<br>K70.9; K71; K73;<br>K74; K76.0                               |
| Diabetes (type1 and 2)                                                                                                  | 1             | 249.00; 249.06; 249.07;<br>249.09; 250.00; 250.06;<br>250.07; 250.09                               | E10.0, E10.1; E10.9;<br>E11.0; E11.1; E11.9                                       |
| Hemiplegia                                                                                                              | 2             | 344                                                                                                | G81; G82                                                                          |
| Moderate or severe renal disease                                                                                        | 2             | 403; 404; 580-583;<br>584; 590.09; 593.19;<br>753.10-753.19; 792                                   | I12; I13; N00-N05;<br>N07; N11; N14; N17-<br>N19; Q61                             |
| Diabetes with end organ damage                                                                                          | 2             | 249.01-249.05; 249.08<br>250.01-250.05; 250.08                                                     | E10.2-E10.8<br>E11.2-E11.8                                                        |
| Moderate or severe liver disease                                                                                        | 3             | 070.00; 070.02; 070.04;<br>070.06; 070.08; 573.00;<br>456.00-456.09                                | B15.0; B16.0; B16.2;<br>B19.0; K70.4; K72;<br>K76.6; I85                          |

<sup>1</sup> R06AX11 (astemizole) and R06AX12 (terfenadine) were withdrawn from the market due to risk of QTc interval prolongation and related arrhythmias in 1999 and 2004, respectively.

<sup>2</sup> ICD-8, International Classification of Diseases, Eighth Revision

<sup>3</sup> ICD-10, International Classification of Diseases, Tenth Revision

**Supplemental Table S3.** Description of the subjects included in the analyses for all non-localized cancers. Related to Tables 1 and S6.

| Variable                                 | Level    | Non-user <sup>1</sup> | Non-CAD <sup>2</sup> | CAD <sup>3</sup> |
|------------------------------------------|----------|-----------------------|----------------------|------------------|
| <b>Astemizole</b>                        | Non-user | 114760                | 2589                 | 1519             |
|                                          | User     | 0                     | 0                    | 38               |
| <b>Clemastine</b>                        | Non-user | 114760                | 2589                 | 1403             |
|                                          | User     | 0                     | 0                    | 154              |
| <b>Desloratadine</b>                     | Non-user | 114760                | 2589                 | 1277             |
|                                          | User     | 0                     | 0                    | 280              |
| <b>Ebastine</b>                          | Non-user | 114760                | 2589                 | 1470             |
|                                          | User     | 0                     | 0                    | 87               |
| <b>Loratadine</b>                        | Non-user | 114760                | 2589                 | 703              |
|                                          | User     | 0                     | 0                    | 854              |
| <b>Terfenadine</b>                       | Non-user | 114760                | 2589                 | 1391             |
|                                          | User     | 0                     | 0                    | 166              |
| <b>CAD antihistamine<sup>3</sup></b>     | Non-user | 114760                | 2589                 | 0                |
|                                          | User     | 0                     | 0                    | 1557             |
| <b>Cetirizine</b>                        | Non-user | 114760                | 448                  | 1557             |
|                                          | User     | 0                     | 2141                 | 0                |
| <b>Fexofenadine</b>                      | Non-user | 114760                | 2100                 | 1557             |
|                                          | User     | 0                     | 489                  | 0                |
| <b>Non-CAD antihistamine<sup>2</sup></b> | Non-user | 114760                | 0                    | 1557             |
|                                          | User     | 0                     | 2589                 | 0                |
| <b>Age category</b>                      | 31-59    | 36944                 | 876                  | 547              |
|                                          | 59-68    | 30949                 | 701                  | 400              |
|                                          | 68-77    | 28203                 | 607                  | 360              |
|                                          | 77-109   | 18664                 | 405                  | 250              |
| <b>Charlson index</b>                    | 0        | 82360                 | 1646                 | 1019             |
|                                          | 1        | 20614                 | 565                  | 334              |
|                                          | 2+       | 11786                 | 378                  | 204              |
| <b>Aspirin</b>                           | Non-user | 97266                 | 2131                 | 1311             |
|                                          | User     | 17494                 | 458                  | 246              |
| <b>Statins</b>                           | Non-user | 102941                | 2284                 | 1396             |
|                                          | User     | 11819                 | 305                  | 161              |
| <b>NANSAID</b>                           | Non-user | 90235                 | 1916                 | 1161             |
|                                          | User     | 24525                 | 673                  | 396              |
| <b>ACEi or ARB</b>                       | Non-user | 96814                 | 2087                 | 1302             |
|                                          | User     | 17946                 | 502                  | 255              |
| <b>Disposable income<sup>4</sup></b>     | 1        | 25939                 | 607                  | 340              |
|                                          | 2        | 28957                 | 673                  | 413              |
|                                          | 3        | 19817                 | 454                  | 274              |
|                                          | 4        | 17868                 | 408                  | 244              |
|                                          | 5        | 22179                 | 447                  | 286              |

<sup>1</sup>Non-user of astemizole, clemastine, desloratadine, ebastine, loratadine, terfenadine, cetirizine and fexofenadine

<sup>2</sup>Cetirizine and fexofenadine

<sup>3</sup>Astemizole, clemastine, desloratadine, ebastine, loratadine or terfenadine

<sup>4</sup>Disposable income categories according to quintiles

**Supplemental Table S4.** Description of the subjects included in the analyses for non-localized NSCLC. Related to Tables 2 and S7.

| Variable                                 | Level    | Non-user <sup>1</sup> | Non-CAD <sup>2</sup> | CAD <sup>3</sup> |
|------------------------------------------|----------|-----------------------|----------------------|------------------|
| <b>Astemizole</b>                        | Non-user | 9506                  | 274                  | 123              |
|                                          | User     | 0                     | 0                    | 0                |
| <b>Clemastine</b>                        | Non-user | 9506                  | 274                  | 114              |
|                                          | User     | 0                     | 0                    | 9                |
| <b>Desloratadine</b>                     | Non-user | 9506                  | 274                  | 76               |
|                                          | User     | 0                     | 0                    | 47               |
| <b>Ebastine</b>                          | Non-user | 9506                  | 274                  | 116              |
|                                          | User     | 0                     | 0                    | 7                |
| <b>Loratadine</b>                        | Non-user | 9506                  | 274                  | 63               |
|                                          | User     | 0                     | 0                    | 60               |
| <b>Terfenadine</b>                       | Non-user | 9506                  | 274                  | 123              |
|                                          | User     | 0                     | 0                    | 0                |
| <b>CAD antihistamine<sup>3</sup></b>     | Non-user | 9506                  | 274                  | 0                |
|                                          | User     | 0                     | 0                    | 123              |
| <b>Cetirizine</b>                        | Non-user | 9506                  | 70                   | 123              |
|                                          | User     | 0                     | 204                  | 0                |
| <b>Fexofenadine</b>                      | Non-user | 9506                  | 197                  | 123              |
|                                          | User     | 0                     | 77                   | 0                |
| <b>Non-CAD antihistamine<sup>2</sup></b> | Non-user | 9506                  | 0                    | 123              |
|                                          | User     | 0                     | 274                  | 0                |
| <b>Age category</b>                      | 31-59    | 2198                  | 71                   | 20               |
|                                          | 59-68    | 3053                  | 89                   | 50               |
|                                          | 68-77    | 2842                  | 70                   | 33               |
|                                          | 77-109   | 1413                  | 44                   | 20               |
| <b>Charlson index</b>                    | 0        | 5506                  | 142                  | 54               |
|                                          | 1        | 2407                  | 74                   | 35               |
|                                          | 2+       | 1593                  | 58                   | 34               |
| <b>Aspirin</b>                           | Non-user | 7090                  | 198                  | 77               |
|                                          | User     | 2416                  | 76                   | 46               |
| <b>Statins</b>                           | Non-user | 7440                  | 211                  | 90               |
|                                          | User     | 2066                  | 63                   | 33               |
| <b>NANSAID</b>                           | Non-user | 6538                  | 181                  | 90               |
|                                          | User     | 2968                  | 93                   | 33               |
| <b>ACEi or ARB</b>                       | Non-user | 7348                  | 195                  | 85               |
|                                          | User     | 2158                  | 79                   | 38               |
| <b>Disposable income<sup>4</sup></b>     | 1        | 2815                  | 71                   | 38               |
|                                          | 2        | 2732                  | 87                   | 37               |
|                                          | 3        | 1587                  | 43                   | 21               |
|                                          | 4        | 1198                  | 25                   | 10               |
|                                          | 5        | 1174                  | 48                   | 17               |

<sup>1</sup>Non-user of astemizole, clemastine, desloratadine, ebastine, loratadine, terfenadine, cetirizine and fexofenadine

<sup>2</sup>Cetirizine and fexofenadine

<sup>3</sup>Astemizole, clemastine, desloratadine, ebastine, loratadine or terfenadine

<sup>4</sup>Disposable income categories according to quintiles from lowest (1) to highest (5)

**Supplemental Table S5.** CAD library screen for cytotoxicity against A549 cells.

| Compound name                    | Cell death % $\pm$ SD <sup>1</sup> |      |            |      | Company / Cat. #             | CAS #       |
|----------------------------------|------------------------------------|------|------------|------|------------------------------|-------------|
|                                  | 10 $\mu$ M                         | SD   | 50 $\mu$ M | SD   |                              |             |
| Alverine citrate                 | 2.2                                | 0.3  | 8.1        | 4.0  | Sigma / A0424                | 5560-59-8   |
| Amiodarone HCl                   | 6.6                                | 4.5  | 69.9       | 9.7  | Sigma / A8423                | 19774-82-4  |
| Amitriptyline HCl                | 2.5                                | 0.6  | 25.3       | 25.1 | Sigma / A8404                | 549-18-8    |
| Amlodipine besylate              | 2.0                                | 0.5  | 55.1       | 9.1  | Sigma / A5605                | 111470-99-6 |
| Aprindine HCl                    | 3.2                                | 0.8  | 39.9       | 41.2 | Sigma / A7606                | 33237-74-0  |
| Astemizole                       | 70.0                               | 14.2 | 80.8       | 11.8 | Sigma / A2861                | 68844-77-9  |
| AY9944                           | 5.7                                | 1.2  | 81.4       | 16.2 | Calbiochem / 190080          | 366-93-8    |
| Benztropine mesylate             | 1.9                                | 0.1  | 8.3        | 2.3  | MP Biochemicals / 153626     | 132-17-2    |
| Bepriidil HCl                    | 4.6                                | 0.1  | 83.4       | 4.7  | Sigma / B5016                | 74764-40-2  |
| Biperiden HCl                    | 3.7                                | 1.7  | 62.0       | 50.0 | Sigma / B5311                | 1235-82-1   |
| Camylofine diHCl                 | 1.9                                | 0.2  | 5.6        | 2.8  | Sigma / C4665                | 54-30-8     |
| Carvedilol                       | 7.6                                | 1.6  | 87.4       | 7.9  | Sigma / C3993                | 72956-09-3  |
| Cepharanthine                    | 52.1                               | 14.0 | 93.8       | 3.7  | LKT Laboratories / C1718     | 481-49-2    |
| Chlorpromazine HCl               | 27.7                               | 30.6 | 91.1       | 4.6  | Sigma / C8138                | 69-09-0     |
| Chlorprothixene                  | 46.6                               | 52.2 | 63.2       | 29.7 | Sigma / C1671                | 6469-93-8   |
| Cinnarizine                      | 6.1                                | 7.8  | 1.8        | 0.3  | Sigma / C5270                | 298-57-7    |
| Clemastine fumarate              | 27.5                               | 42.4 | 63.1       | 35.6 | Sigma / SML0445              | 14976-57-9  |
| Clofazimine                      | 2.8                                | 0.1  | 21.9       | 5.0  | Sigma / C8895                | 2030-63-9   |
| Clomiphene citrate               | 30.0                               | 2.4  | 88.7       | 7.7  | Sigma / C6272                | 50-41-9     |
| Cloperastine HCl                 | 2.5                                | 0.3  | 53.5       | 38.4 | Sigma / C2040                | 14984-68-0  |
| Conessine                        | 5.0                                | 1.0  | 11.7       | 2.4  | Sigma / SML0095              | 546-06-5    |
| Cyclobenzaprine HCl              | 2.7                                | 0.7  | 55.4       | 13.7 | Sigma / C4542                | 6202-23-9   |
| Cyproheptadine HCl sesquihydrate | 2.2                                | 0.8  | 5.8        | 2.8  | Sigma / C6022                | 41354-29-4  |
| Desipramine HCl                  | 3.6                                | 2.4  | 30.5       | 19.7 | Sigma / D3900                | 58-28-6     |
| Desloratadine                    | 2.5                                | 0.4  | 32.6       | 23.0 | Sigma / D1069                | 100643-71-8 |
| Dicyclomine HCl                  | 2.3                                | 1.3  | 33.8       | 53.7 | Sigma / D7909                | 67-92-5     |
| Dimebolin HCl                    | 2.0                                | 0.8  | 4.7        | 4.0  | Cayman Chemicals / 10011349  | 97657-92-6  |
| Drofenine HCl                    | 2.1                                | 0.1  | 7.7        | 3.9  | Sigma / D7402                | 548-66-3    |
| Emetine diHCl hydrate            | 41.0                               | 9.6  | 64.2       | 20.2 | Sigma / E2375                | 7083-71-8   |
| Ethopropazine                    | 2.3                                | 0.6  | 18.3       | 18.4 | Sigma / E5406                | 1094-08-2   |
| Fendiline HCl                    | 11.6                               | 1.8  | 87.3       | 6.0  | Sigma / F7265                | 13636-18-5  |
| Flunarizine diHCl                | 3.5                                | 0.4  | 48.6       | 10.8 | Sigma / F8257                | 30484-77-6  |
| Fluoxetine HCl                   | 2.9                                | 0.5  | 89.1       | 8.9  | Sigma / F132                 | 56296-78-7  |
| Flupentixol diHCl                | 25.4                               | 46.9 | 76.5       | 32.8 | EPRS <sup>2</sup> / Y0000064 | 2413-38-9   |
| Fluphenazine diHCl               | 5.5                                | 1.4  | 94.8       | 3.6  | Sigma / F4765                | 146-56-5    |
| Hydroxyzine diHCl                | 1.9                                | 0.3  | 5.2        | 3.3  | Sigma / H8885                | 2192-20-3   |
| Levomepromazine HCl              | 2.8                                | 1.1  | 82.1       | 20.0 | EPRS <sup>2</sup> / L0500000 | 1236-99-3   |

|                            |      |      |      |      |                                      |             |
|----------------------------|------|------|------|------|--------------------------------------|-------------|
| Lidoflazine                | 13.2 | 11.1 | 87.5 | 8.8  | Sigma / L9668                        | 3416-26-0   |
| Lofepamine HCl             | 3.1  | 0.2  | 19.1 | 4.8  | BPCRS <sup>3</sup> / 697             | 26786-32-3  |
| Loperamide HCl             | 2.9  | 0.2  | 22.2 | 5.2  | Sigma / L4762                        | 34552-83-5  |
| Loratadine                 | 3.4  | 1.2  | 60.0 | 13.5 | Sigma / L9664                        | 79794-75-5  |
| Maprotiline HCl            | 2.4  | 0.0  | 88.8 | 10.0 | Sigma / M9651                        | 10347-81-6  |
| Mefloquine HCl             | 52.6 | 21.0 | 86.6 | 4.7  | Sigma / M2319                        | 51773-92-3  |
| Metergoline                | 3.3  | 0.7  | 90.1 | 5.0  | Sigma / M3668                        | 17692-51-2  |
| Metixene HCl               | 3.7  | 1.0  | 95.2 | 1.8  | EPRS <sup>2</sup> / M180800          | 7081-40-5   |
| Metoprolol tartrate        | 1.6  | 0.2  | 2.0  | 0.8  | Sigma / M1830000-1EA                 | 56392-17-7  |
| Mibefradil diHCl hydrate   | 13.2 | 16.1 | 93.4 | 1.8  | Sigma / M5441                        | 116666-63-8 |
| Norfluoxetine HCl          | 2.6  | 0.8  | 86.2 | 4.3  | Sigma / F133                         | 57226-68-3  |
| Nortriptyline HCl          | 3.4  | 1.7  | 89.4 | 2.8  | Sigma / N7261                        | 894-71-3    |
| Penfluridol                | 85.9 | 6.5  | 87.5 | 6.2  | Sigma / P3371                        | 26864-56-2  |
| Perhexiline maleate        | 81.6 | 9.4  | 78.8 | 10.1 | Sigma / SML0120                      | 6724-53-4   |
| Perphenazine               | 17.0 | 21.8 | 92.9 | 2.2  | Sigma / P6402                        | 58-39-9     |
| Pimethixene maleate        | 2.0  | 0.3  | 11.0 | 12.2 | Sigma / P4545                        | 13187-06-9  |
| Pimozide                   | 25.3 | 35.1 | 79.2 | 11.5 | Sigma / P1793                        | 2062-78-4   |
| Prenylamine                | 11.9 | 2.1  | 83.5 | 6.8  | Toronto Research Chemicals / P712800 | 390-64-7    |
| Prochlorperazine dimaleate | 7.7  | 10.9 | 67.4 | 37.2 | Sigma / P9178                        | 84-02-6     |
| (R)-(+)-Propranolol HCl    | 3.5  | 3.4  | 5.9  | 5.7  | Sigma / P0689                        | 13071-11-9  |
| Protriptyline HCl          | 4.2  | 2.2  | 56.6 | 32.9 | Sigma / P8813                        | 1225-55-4   |
| Sertindole                 | 69.9 | 30.2 | 97.3 | 0.7  | Sigma / S8072                        | 106516-24-9 |
| Sertraline HCl             | 5.8  | 2.7  | 94.8 | 2.4  | Sigma / S6319                        | 79559-97-0  |
| Siramesine                 | 62.4 | 13.3 | 94.5 | 2.2  | H. Lundbeck A/S                      | 147817-50-3 |
| Solasodine                 | 28.6 | 5.4  | 53.0 | 25.9 | Aldrich Chemistry / R204536          | 126-17-0    |
| Suloctidil                 | 7.0  | 2.3  | 81.6 | 7.0  | Sigma / S9384                        | 54767-75-8  |
| Tamoxifen citrate          | 3.4  | 0.7  | 94.5 | 1.9  | Sigma / T9262                        | 54965-24-1  |
| Terfenadine                | 93.8 | 2.4  | 87.1 | 10.8 | Sigma / T9652                        | 50679-08-8  |
| Thiethylperazine maleate   | 10.7 | 8.7  | 97.3 | 0.2  | USP Reference Standard / 1658008     | 1179-69-7   |
| Thioridazine HCl           | 25.5 | 45.1 | 89.0 | 7.4  | Sigma / T9025                        | 130-61-0    |
| Tomatidine HCl             | 7.3  | 2.2  | 76.2 | 1.2  | Sigma / T2909                        | 6192-62-7   |
| Toremifene citrate         | 3.3  | 0.5  | 92.9 | 3.3  | Sigma / T7204                        | 89778-27-8  |
| Trifluoperazine diHCl      | 6.8  | 7.0  | 94.4 | 3.8  | Sigma / T8516                        | 440-17-5    |
| Zolantidine                | 3.5  | 1.2  | 57.8 | 25.1 | Tocris / 1070                        | 104076-39-3 |
| Zuclopenthixol HCl         | 26.6 | 44.5 | 72.3 | 33.4 | BPCRS <sup>3</sup>                   | 58045-23-1  |

<sup>1</sup>A549 cells were treated with indicated CAD concentrations for 48 h and cell death was measured by propidium iodide exclusion assay. Values represent mean  $\pm$  SD for a minimum of three independent, triplicate experiments.

<sup>2</sup>European Pharmacopoeia Reference Standard.

<sup>3</sup>British Pharmacopoeia Chemical Reference Substance.

<sup>4</sup>Siramesine was kindly provided by Dr. Christiane Volbracht, Lundbeck A/S.

**Supplemental Table S6.** Adjusted hazard ratios for all-cause mortality among patients with any non-localized cancer and  $\geq 1$  prescriptions of indicated antihistamines within six months after the diagnosis. Related to Table 1.

| Drug                                    | HR <sup>1</sup> | 2.5% | 97.5% | P     | N    | N (pre) <sup>2</sup> |
|-----------------------------------------|-----------------|------|-------|-------|------|----------------------|
| Astemizole                              | 0.68            | 0.47 | 0.98  | 0.041 | 38   | 52                   |
| Clemastine                              | 1.33            | 1.10 | 1.60  | 0.004 | 154  | 21                   |
| Desloratadine                           | 0.95            | 0.80 | 1.13  | 0.554 | 280  | 299                  |
| Ebastine                                | 0.83            | 0.63 | 1.10  | 0.189 | 87   | 87                   |
| Loratadine                              | 0.91            | 0.83 | 0.99  | 0.026 | 854  | 828                  |
| Terfenadine                             | 1.00            | 0.84 | 1.20  | 0.954 | 166  | 131                  |
| All CADs <sup>3</sup>                   | 0.94            | 0.88 | 1.01  | 0.070 | 1557 | 1418                 |
| All CADs except clemastine <sup>4</sup> | 0.91            | 0.85 | 0.97  | 0.006 | 1414 | 1403                 |
| Cetirizine <sup>5</sup>                 | 1.03            | 0.97 | 1.09  | 0.317 | 2141 | 1677                 |
| Fexofenadine <sup>5</sup>               | 0.90            | 0.80 | 1.02  | 0.110 | 469  | 494                  |
| All non-CADs <sup>5,6</sup>             | 1.01            | 0.96 | 1.06  | 0.798 | 2589 | 2171                 |

<sup>1</sup>The values are adjusted for the year of diagnosis, age, Charlson score, disposable income and use of aspirin, statins, NSAIDs and ACEi or ARB (Supplemental Table S3).

<sup>2</sup>Number of users within six months before the diagnosis.

<sup>3</sup>Astemizole, clemastine, desloratadine, ebastine, loratadine or terfenadine

<sup>4</sup>Clemastine was excluded from the "All CADs" group due to the observed prescription bias.

<sup>5</sup>Users of listed CAD antihistamines were excluded.

<sup>6</sup>Cetirizine or fexofenadine



**Supplemental Table S7.** Adjusted hazard ratios for all-cause mortality among patients with non-localized NSCLC and one or more prescriptions of indicated antihistamines within three months before and after the diagnosis. Related to Table 2.

| <b>Drug</b>                                   | <b>HR<sup>1</sup></b> | <b>2.5%</b> | <b>97.5%</b> | <b>P</b> | <b>N</b> |
|-----------------------------------------------|-----------------------|-------------|--------------|----------|----------|
| <b>Clemastine</b>                             | 1.07                  | 0.50        | 2.29         | 0.864    | 9        |
| <b>Desloratadine</b>                          | 1.14                  | 0.84        | 1.54         | 0.405    | 47       |
| <b>Ebastine</b>                               | 0.65                  | 0.27        | 1.56         | 0.334    | 7        |
| <b>Loratadine</b>                             | 0.71                  | 0.52        | 0.96         | 0.027    | 60       |
| <b>All CADs<sup>3</sup></b>                   | 0.87                  | 0.71        | 1.07         | 0.179    | 116      |
| <b>All CADs except clemastine<sup>4</sup></b> | 0.86                  | 0.70        | 1.06         | 0.154    | 114      |
| <b>Cetirizine<sup>5</sup></b>                 | 0.95                  | 0.81        | 1.12         | 0.598    | 204      |
| <b>Fexofenadine<sup>5</sup></b>               | 1.17                  | 0.91        | 1.50         | 0.227    | 77       |
| <b>All non-CADs<sup>5,6</sup></b>             | 1.03                  | 0.90        | 1.18         | 0.685    | 274      |

<sup>1</sup>The values are adjusted for the year of diagnosis, age, Charlson score, disposable income and use of aspirin, statins, NSAIDs and ACEi or ARB (Supplemental Table S5).

<sup>2</sup>Number of users within six months before the diagnosis.

<sup>3</sup>Astemizole, clemastine, desloratadine, ebastine, loratadine or terfenadine

<sup>4</sup>Clemastine was excluded from the "All CADs" group due to the observed prescription bias.

<sup>5</sup>Users of listed CAD antihistamines were excluded.

<sup>6</sup>Cetirizine or fexofenadine

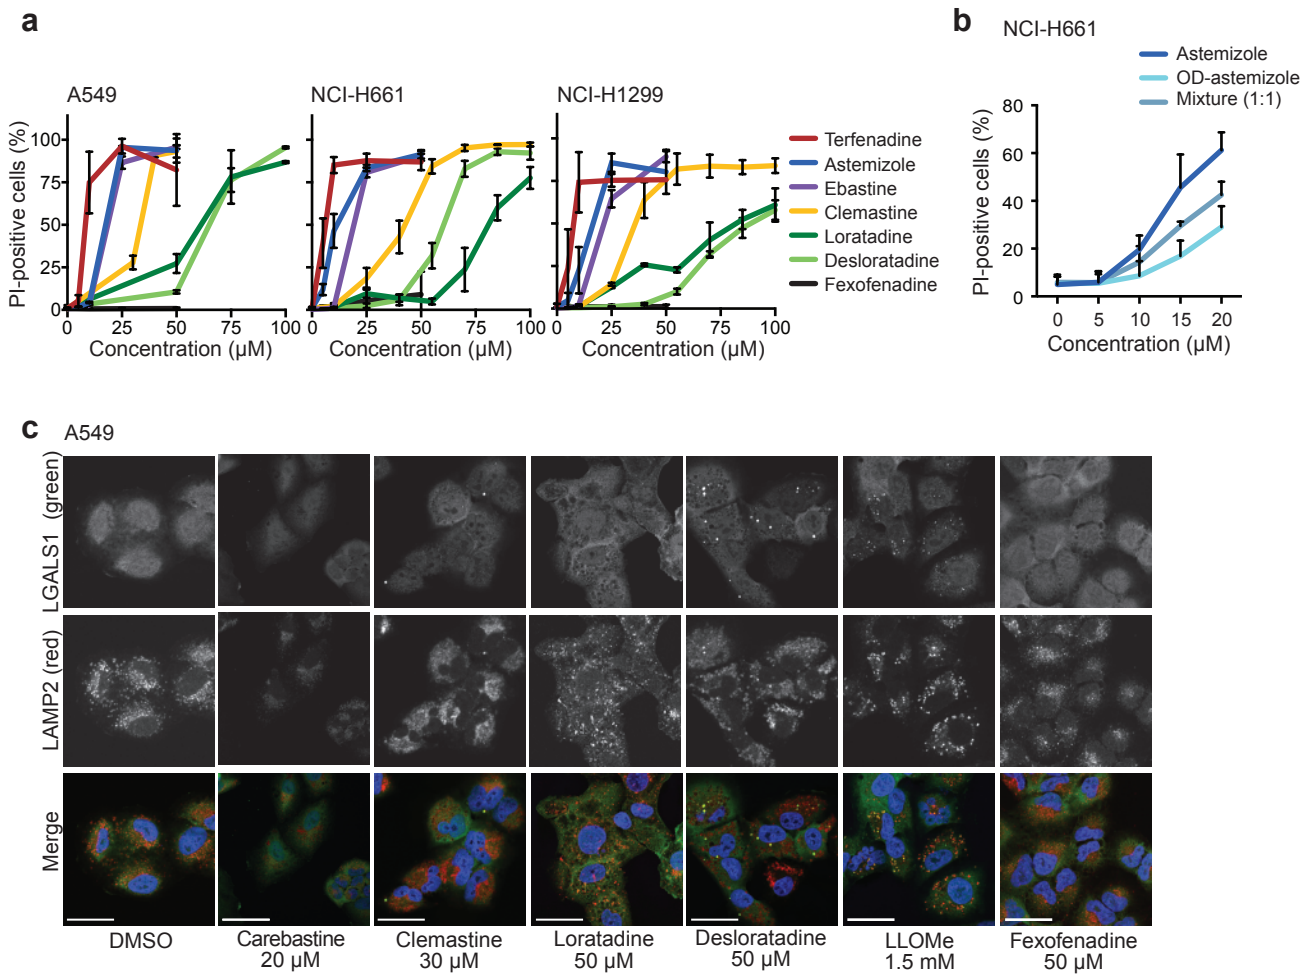

**Supplemental Fig S1. Cytotoxicity and LMP induction by CADs** (Related to Fig 1)

(a) Dose-response curves for the 48 h cytotoxicity (PI exclusion) of the indicated CAD antihistamines in A549, NCI-H661 and NCI-H1299 cells. A non-CAD antihistamine fexofenadine served as a negative control.

(b) Death of NCI-H661 cells (PI exclusion) induced by treatment with indicated doses of astemizole, O-desmethyl-astemizole (OD-astemizole) or their mixture (1:1) for 48 h.

(c) Representative confocal images of A549 cells treated for 24 h as indicated and stained for LGALS1, LAMP2 and DNA (Hoechst-33342). Lysosomal LGALS1 puncta are indicative of lysosomal damage. Quantification of the data is shown in Figure 1C. Scale bars, 50  $\mu\text{m}$

Error bars, SD for at least three independent triplicate experiments.

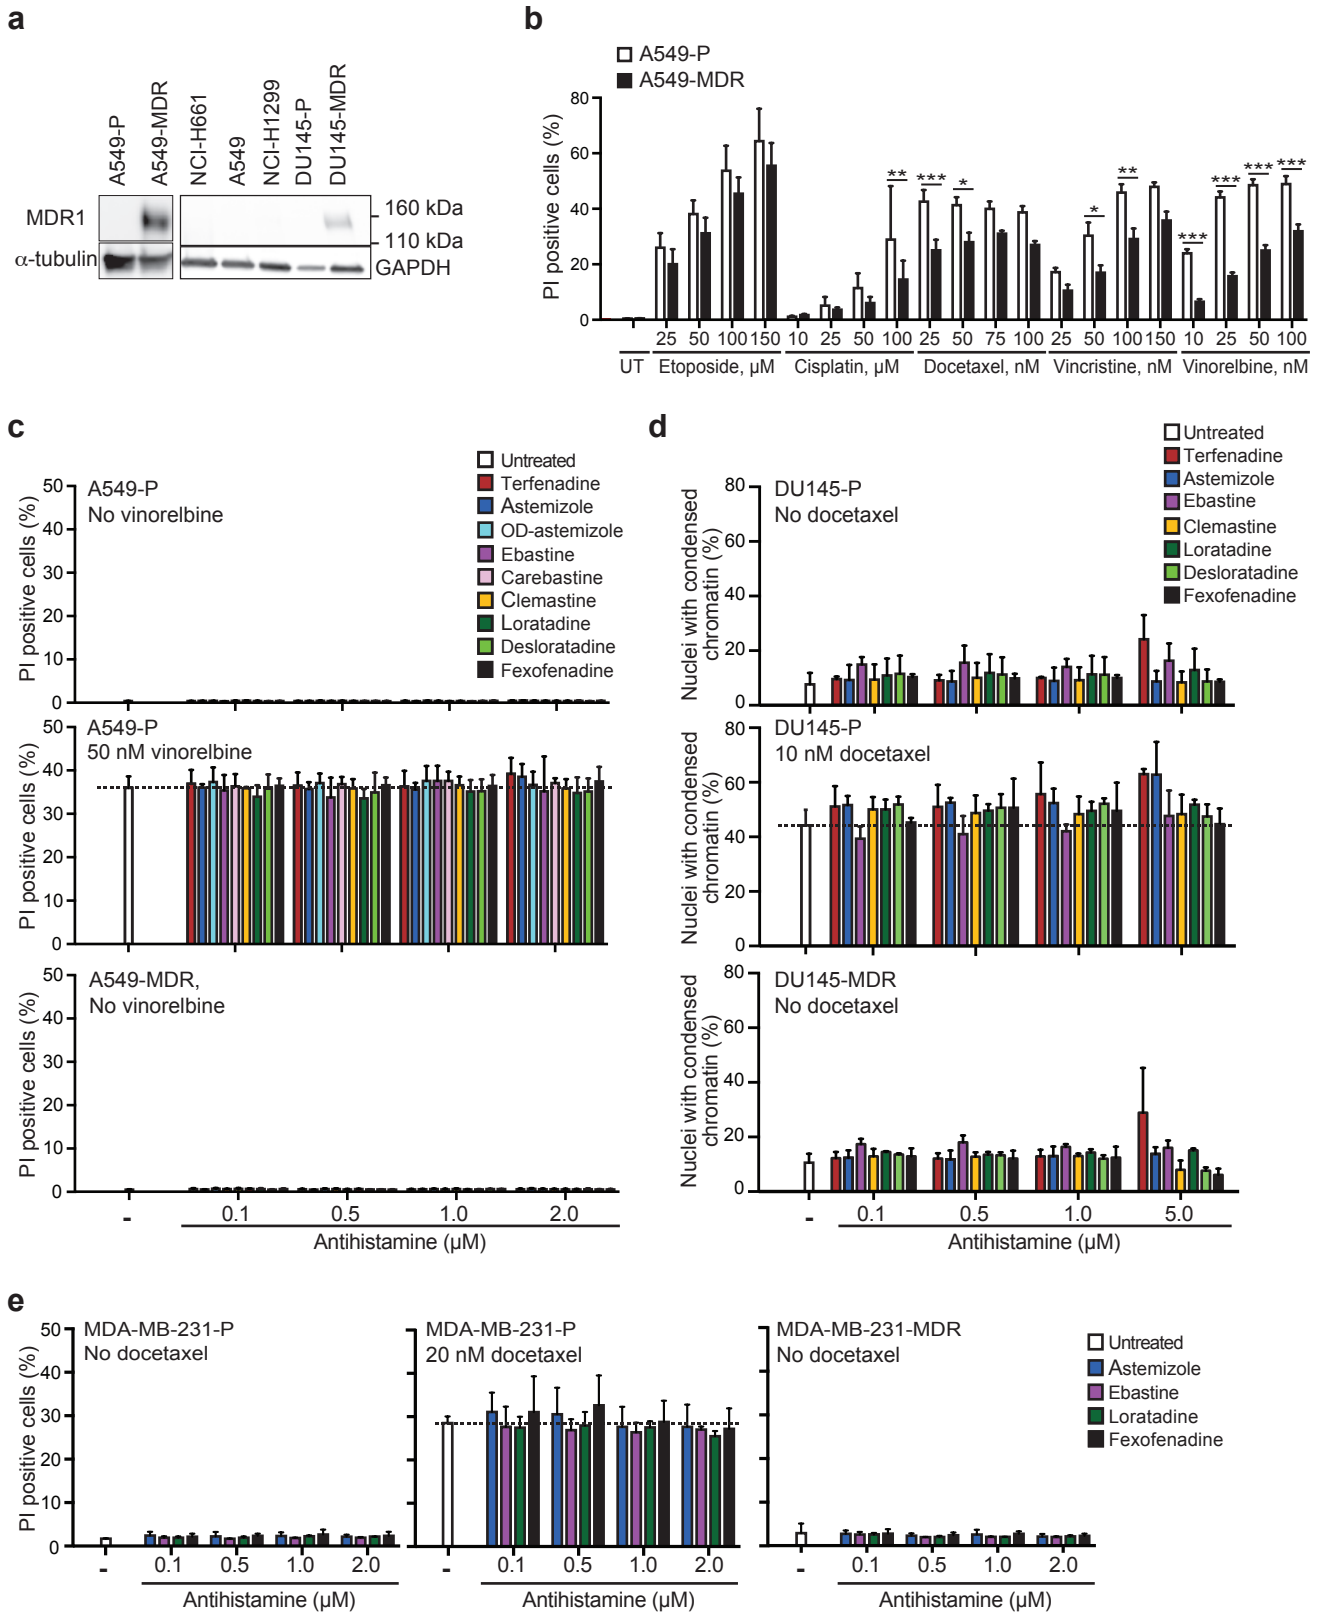

**Supplemental Fig S2. CAD antihistamines sensitize MDR cells to chemotherapy** (Related to Fig 2)

(a) Representative immunoblots (n=3) of MDR1 in lysates of indicated cells.  $\alpha$ -tubulin and GAPDH served as loading controls.

(b) Death of parental (P) and multidrug resistant (MDR) A549 cells (PI exclusion) treated as indicated for 72 h. (c - e) . Death of parental (P) and multidrug resistant (MDR) A549 (c), DU145 (d) and MDA-MB-231 (e) cells (PI exclusion) treated for 48 h with indicated chemotherapeutic drugs alone (white bars) or in combination with indicated concentrations of antihistamines.

Error bars, SD for three independent, triplicate experiments.

\*p<0.05, \*\*p<0.01, \*\*\*p<0.001 when comparing parental and MDR cells in a two-way ANOVA followed by Sidak's multiple comparisons test.

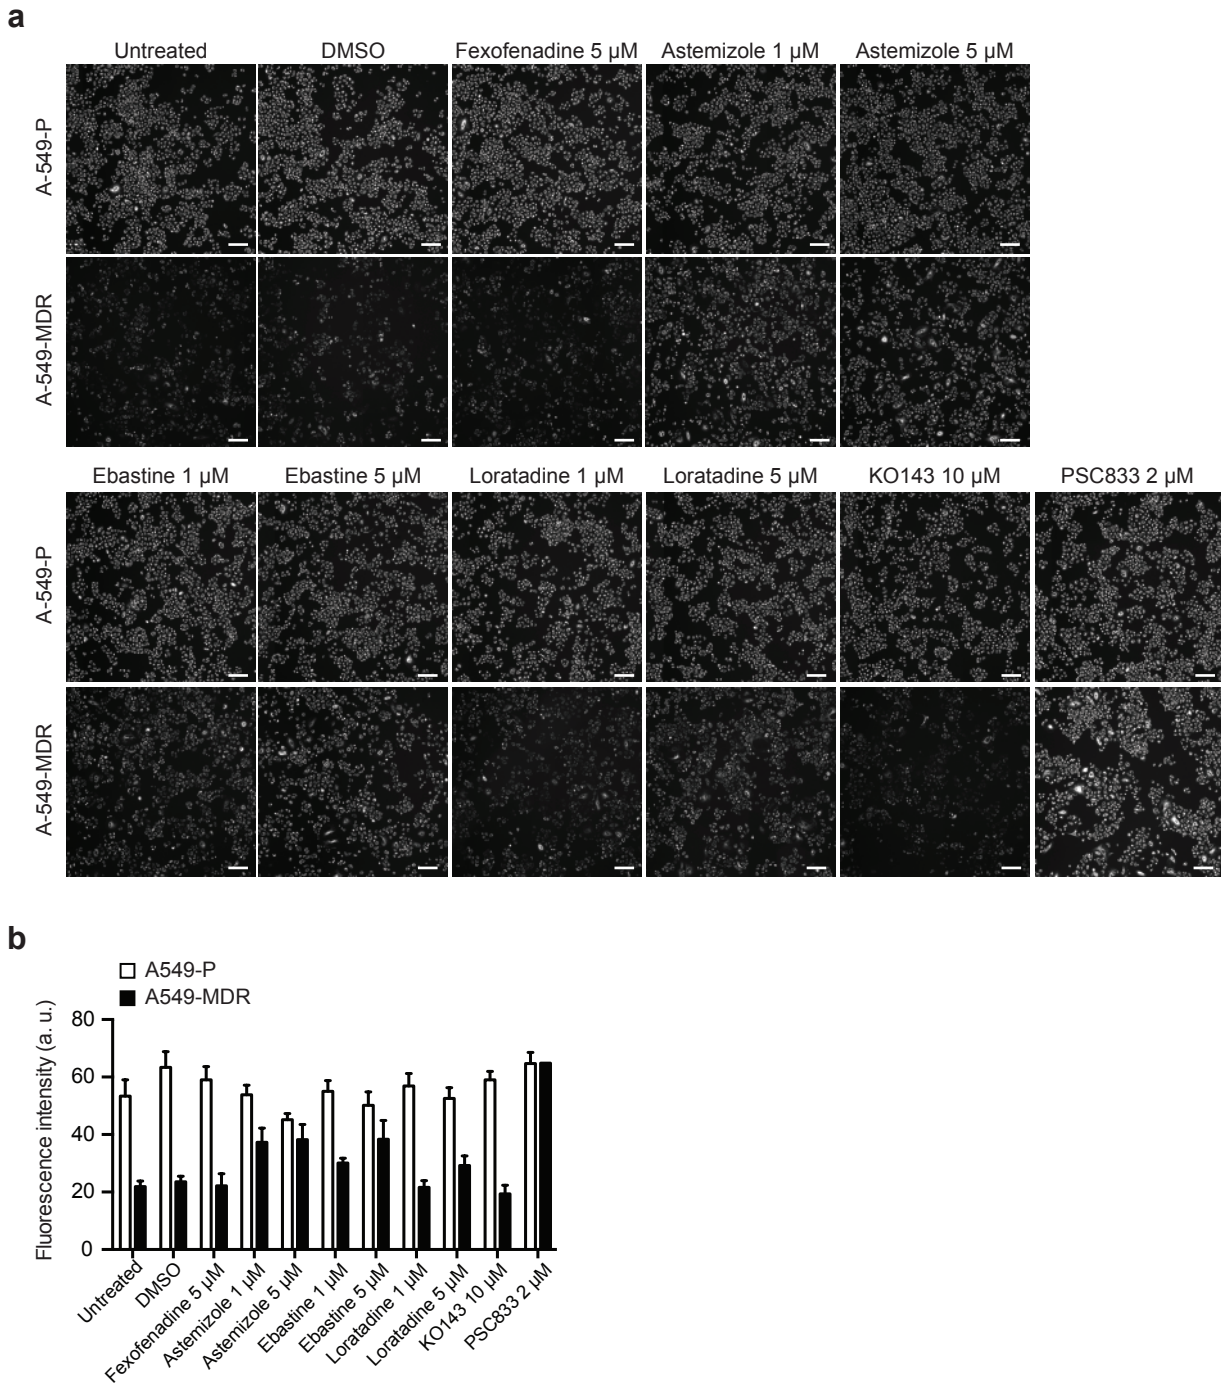

**Supplemental Fig S3: Effect of antihistamines on MDR1-mediated efflux of Rhodamine123**

(Related to Fig 3)

(a) Representative images of A549-P and A549-MDR cells treated with Rhodamine123 for 1 h prior to 2 h treatment with indicated doses of antihistamines or MDR inhibitors KO143 (ABCG2) or PSC833 (MDR1). Scale bars, 100  $\mu$ m.

(b) The red fluorescence intensity of cells in (a) was assessed with the Celigo® Imaging Cytometer.
